# Supplementary material
Source: Springer Nature journal article supplement (https://www.springermedizin.de/resource/supplementary/12885_2012_3765_MOESM1_ESM.pdf/9464400)

**LEGEND**  
 +/- : BRCA1, S1841R positive  
 +/+ : BRCA1, S1841R negative  
 IDC : Invasive Ductal Carcinoma  
 PSU : Primary Site Unknown  
 TNP : Triple Negative Phenotype

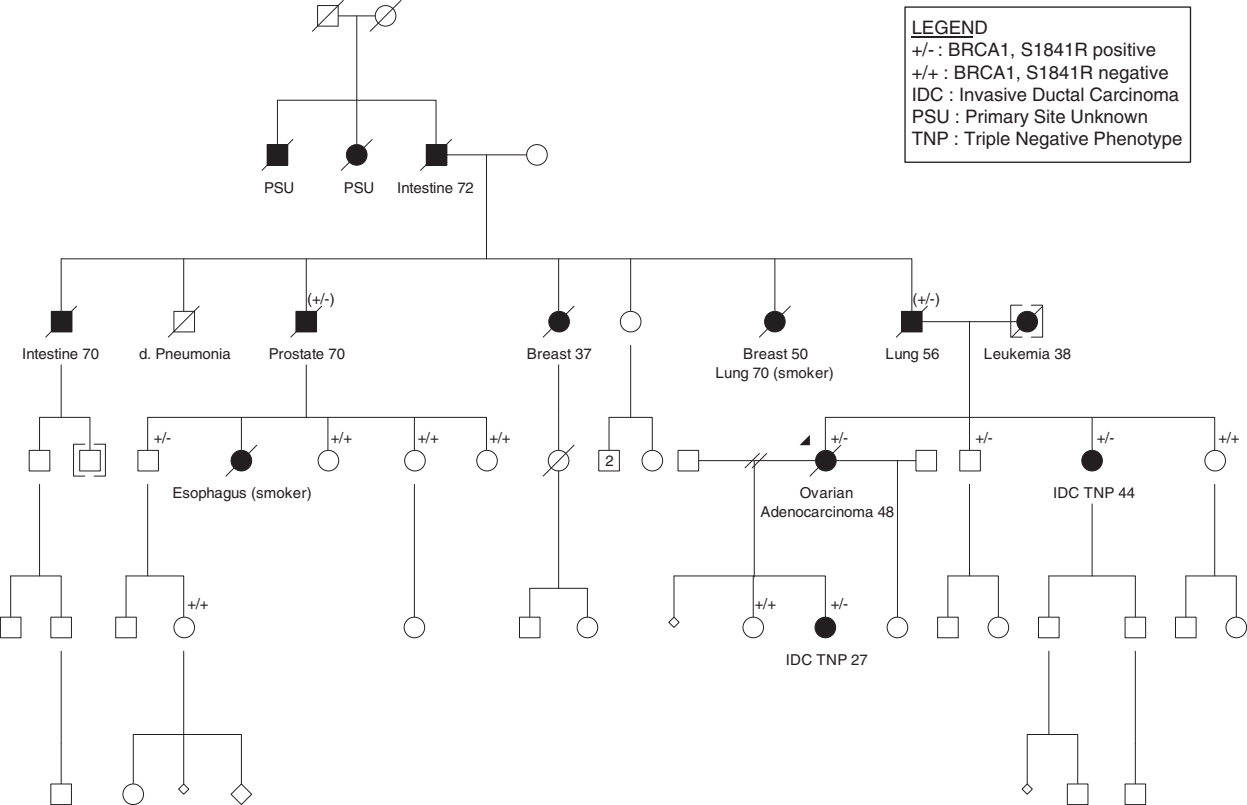

Supplement: MOESM1 [file 9464400]
